# Supplementary material for: Composition and Associations of the Infant Gut Fungal Microbiota with Environmental Factors and Childhood Allergic Outcomes
Source: PubMed Central journal article supplement (PMC8263004; doi:10.1128/mbio.03396-20), 2021-06-01

A

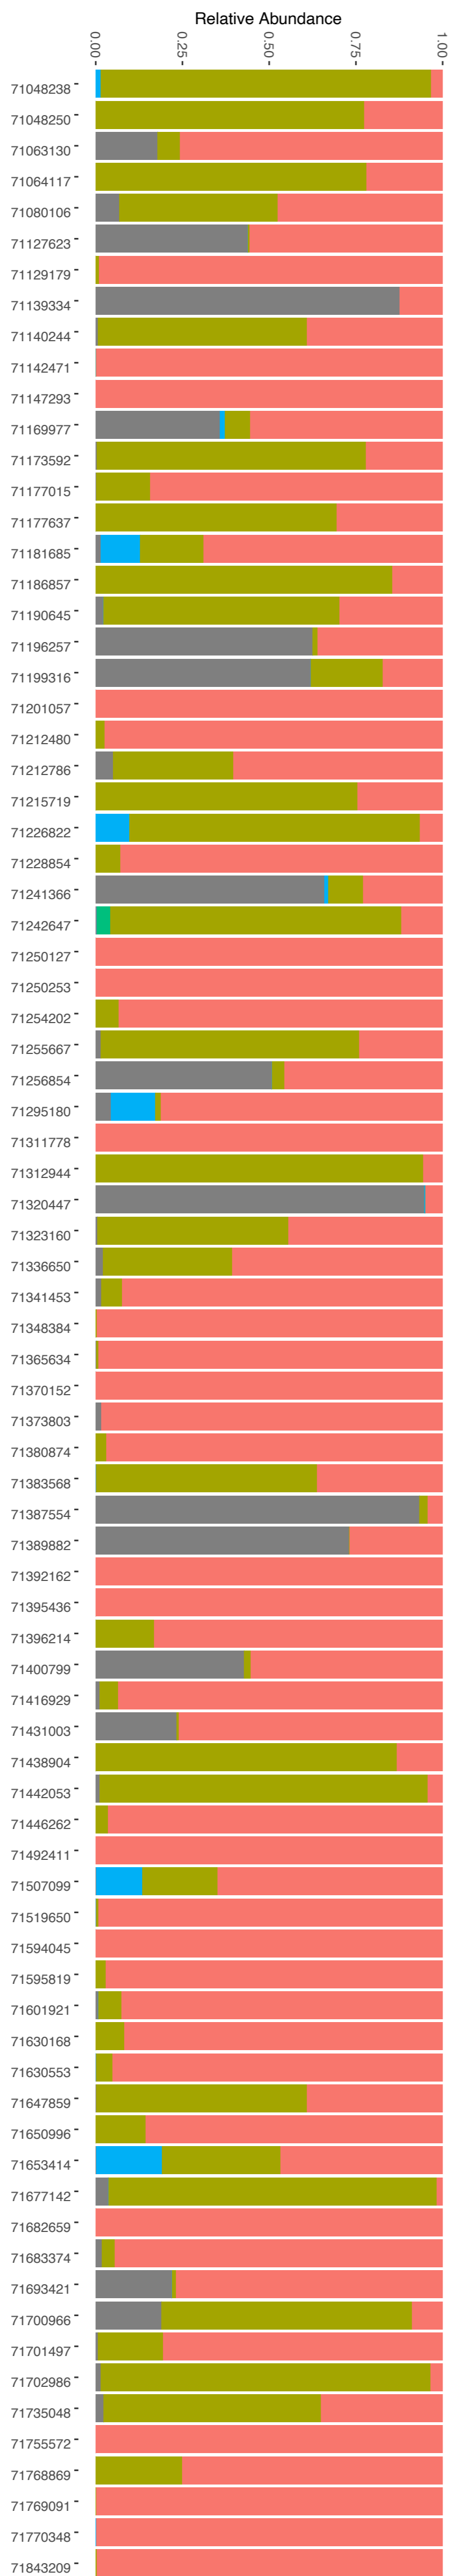

B

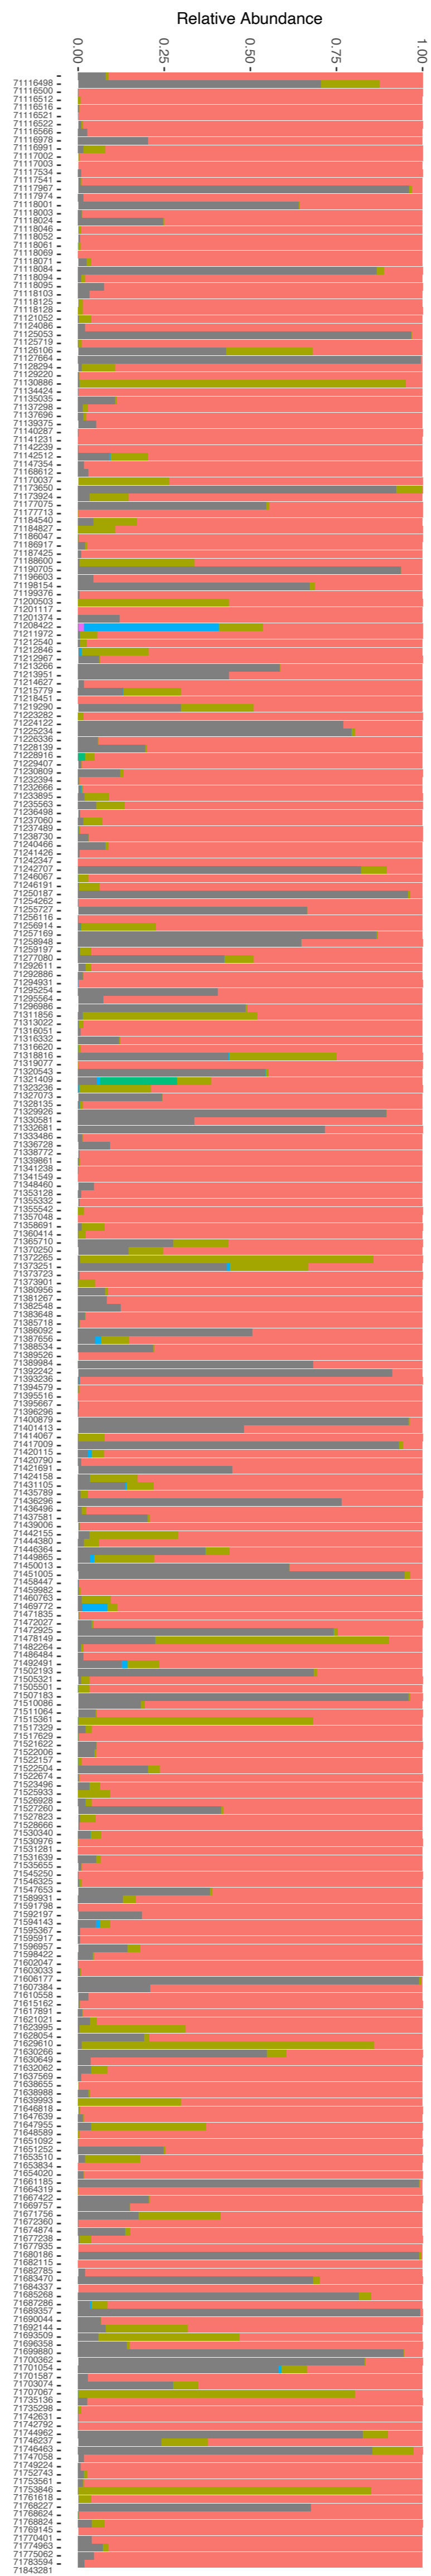

Phylum

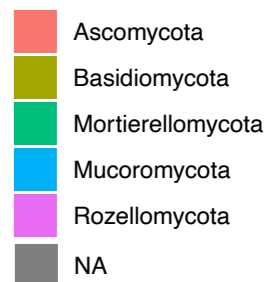

Supplement: mbio.03396-20-sf001.pdf [file mbio.03396-20-sf001.pdf]
